# Supplementary material
Source: PubMed Central journal article supplement (PMC2771692)

**A**

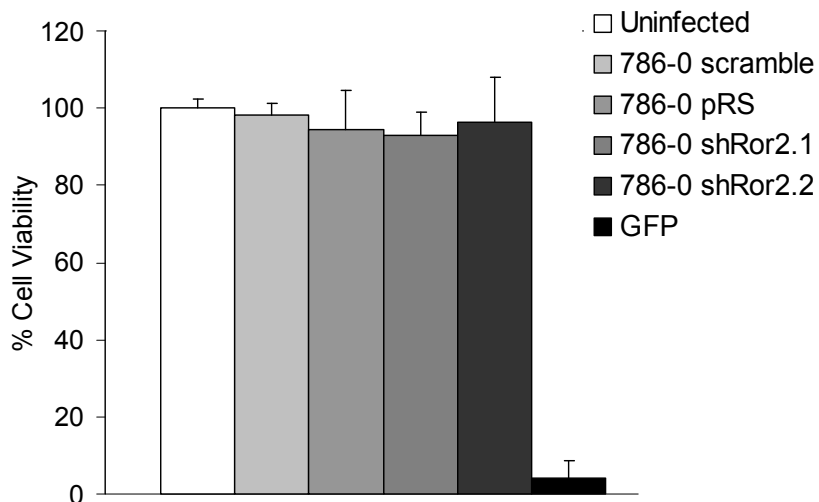

**B**

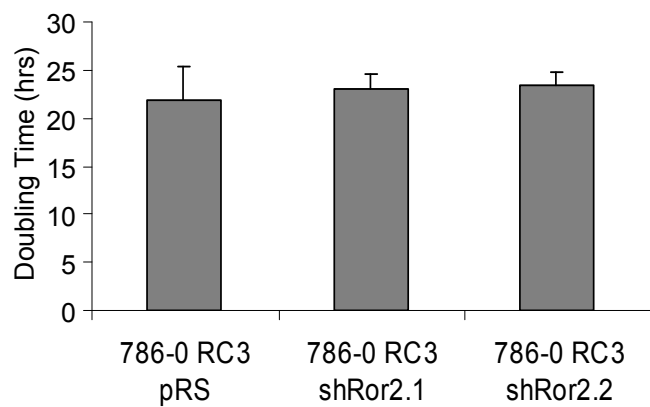

Supplement: NIHMS109562-supplement-4.pdf [file NIHMS109562-supplement-4.pdf]
